# Supplementary material for: A swarm of autonomous miniature underwater robot drifters for exploring submesoscale ocean dynamics
Source: PubMed Central journal article supplement (PMC5286117; doi:10.1038/ncomms14189), 2017-01-24
Supplement: ncomms14189-s1.pdf [file ncomms14189-s1.pdf]

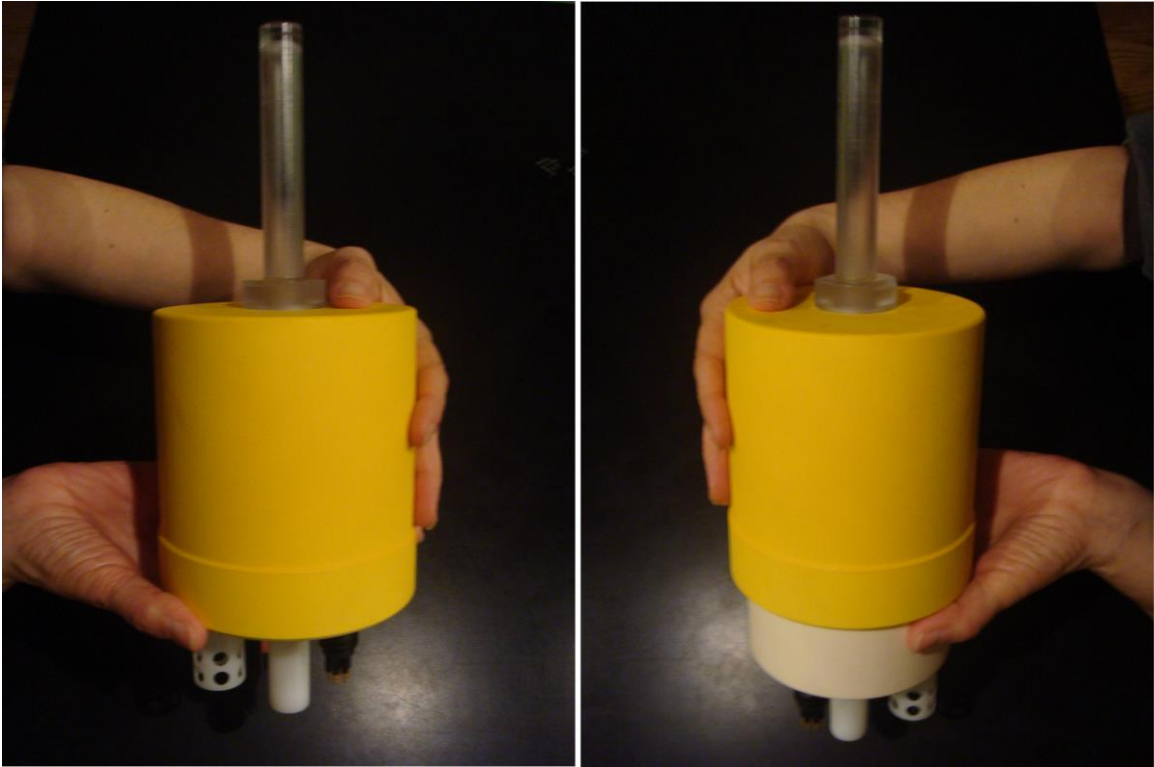

**Supplementary Figure 1. Expansion of the outer M-AUE housing.** The image shows the retracted (left) and expanded (right) housing with the inner sleeve protruding from the bottom of the vehicle.

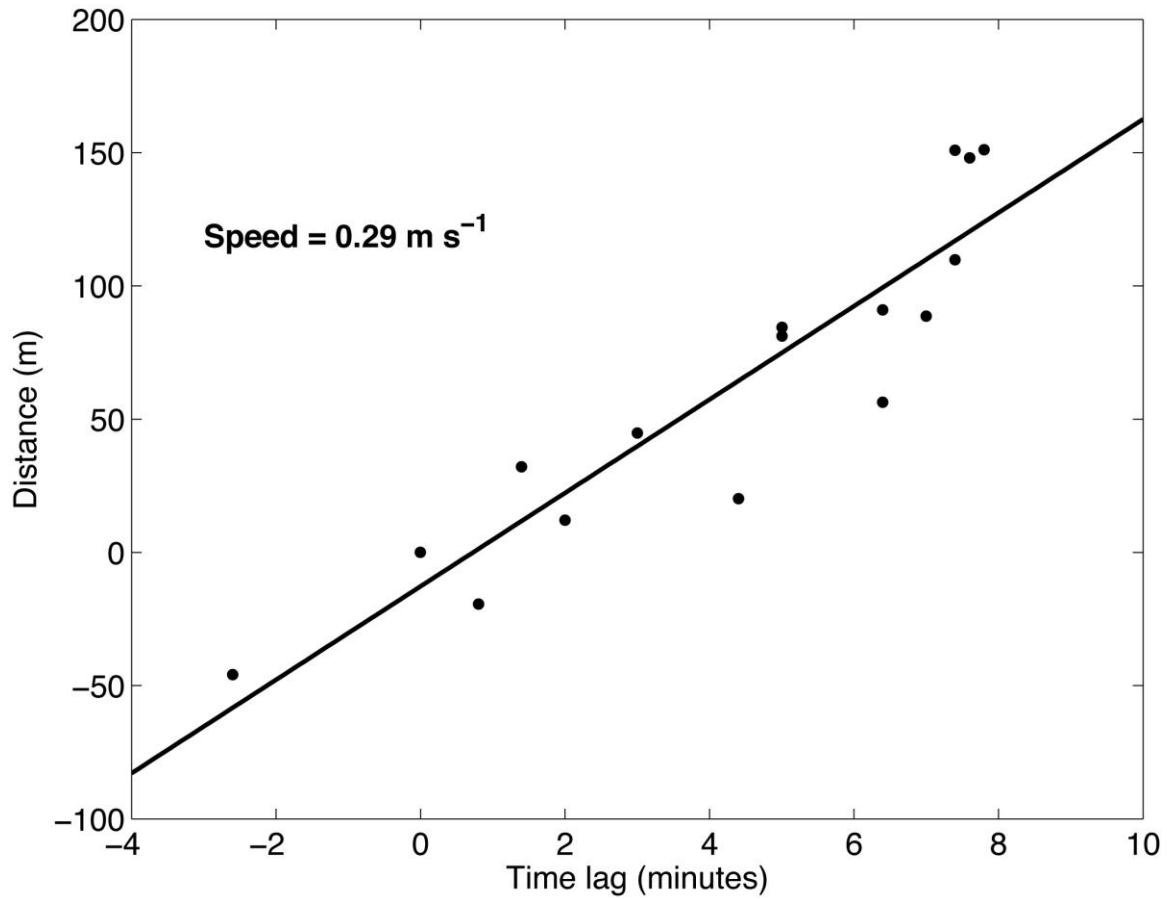

**Supplementary Figure 2. Calculation of the phase speed of the internal wave.** The phase speed of the wave is given by the slope of the regression line of the time lag giving the maximum cross-correlation of the temperature records of a given M-AUE relative to the M-AUE farthest offshore, and the separation distances of the pairs of M-AUEs.

**Supplementary Table 1. The two-state PID control parameters.** State 1 parameters get the M-AUE to depth, transitioning to the state 2 parameters to keep it at depth.

|                     | State 1      | State 2          |
|---------------------|--------------|------------------|
| Proportional gain   | $K_p = 500$  | $K_{p_2} = 250$  |
| Integral gain       | $K_i = 15$   | $K_{i_2} = 0$    |
| Derivative gain     | $K_d = 9200$ | $K_{d_2} = 9200$ |
| Neutral adjust gain | $G_N = 5$    | $G_{N_2} = 2$    |
